# Supplementary material for: Intermediates and products of the reaction of Zn(ii) organyls with tetrel elementZintlions: cluster extensionversuscomplexation
Source: Royal Society of Chemistry journal article supplement (doi:10.1039/d0dt01096k), 2020-01-01
Supplement: d0dt01096k1.pdf [file d0dt01096k1.pdf]

## Intermediates and Products of the Reaction of Zn(II) Organyls with Tetrel Element *Zintl* Ions: Cluster Extension *versus* Complexation

C. Wallach, K. Mayer, T. Henneberger, W. Klein, T.F. Fässler

Technische Universität München, Department Chemie,  
Lichtenbergstraße 4, 85747 Garching, Germany

### Supporting Information

|                                                                                      |    |
|--------------------------------------------------------------------------------------|----|
| Crystallographic details for compounds <b>1 – 8</b> .....                            | 2  |
| Crystal structures of <b>1 – 8</b> and selected bond lengths of <b>1a – 8a</b> ..... | 3  |
| ESI-MS spectra .....                                                                 | 13 |

Table S1: Crystallographic details for compounds **1** – **8**.

| Compound                                                                 | 1                                                                                                             | 2                                                                | 3                                                                                                      | 4                                                                                              |
|--------------------------------------------------------------------------|---------------------------------------------------------------------------------------------------------------|------------------------------------------------------------------|--------------------------------------------------------------------------------------------------------|------------------------------------------------------------------------------------------------|
| formula unit                                                             | C <sub>40</sub> H <sub>88</sub> N <sub>6</sub> O <sub>12</sub> K <sub>2</sub> Ge <sub>4</sub> Zn <sub>2</sub> | H <sub>18</sub> N <sub>6</sub> K <sub>6</sub> Sn <sub>8</sub> Zn | C <sub>56</sub> H <sub>135.2</sub> N <sub>13.4</sub> O <sub>18</sub> K <sub>3</sub> Ge <sub>9</sub> Zn | C <sub>32</sub> H <sub>99</sub> N <sub>13</sub> O <sub>12</sub> K <sub>2</sub> Zn <sub>5</sub> |
| fw [g·mol <sup>-1</sup> ]                                                | 1344.46                                                                                                       | 1522.03                                                          | 2120.64                                                                                                | 1263.29                                                                                        |
| space group                                                              | <i>P</i> $\bar{1}$                                                                                            | <i>P</i> $\bar{1}$                                               | <i>P</i> $\bar{1}$                                                                                     | <i>P</i> $\bar{1}$                                                                             |
| <i>a</i> [Å]                                                             | 11.8577(4)                                                                                                    | 9.6916(6)                                                        | 14.6139(7)                                                                                             | 11.554(2)                                                                                      |
| <i>b</i> [Å]                                                             | 14.5738(5)                                                                                                    | 12.2418(7)                                                       | 14.9181(6)                                                                                             | 14.140(3)                                                                                      |
| <i>c</i> [Å]                                                             | 18.8964(7)                                                                                                    | 18.6684(8)                                                       | 23.6002(8)                                                                                             | 18.988(4)                                                                                      |
| $\alpha$ [°]                                                             | 80.349(3)                                                                                                     | 99.120(4)                                                        | 97.552(3)                                                                                              | 89.02(3)                                                                                       |
| $\beta$ [°]                                                              | 74.590(3)                                                                                                     | 90.067(4)                                                        | 91.645(3)                                                                                              | 77.37(3)                                                                                       |
| $\gamma$ [°]                                                             | 69.598(3)                                                                                                     | 94.894(5)                                                        | 117.312(3)                                                                                             | 87.11(3)                                                                                       |
| <i>V</i> [Å <sup>3</sup> ]                                               | 2940.45(2)                                                                                                    | 2178.7(2)                                                        | 4508.7(3)                                                                                              | 3023.2(1)                                                                                      |
| <i>Z</i>                                                                 | 2                                                                                                             | 2                                                                | 2                                                                                                      | 2                                                                                              |
| <i>T</i> [K]                                                             | 150(2)                                                                                                        | 120(2)                                                           | 150(2)                                                                                                 | 150(2)                                                                                         |
| $\lambda$ [Å]                                                            | 0.71073                                                                                                       | 0.71073                                                          | 0.71073                                                                                                | 0.71073                                                                                        |
| $\rho_{\text{calcd}}$ [g·cm <sup>-3</sup> ]                              | 1.518                                                                                                         | 2.320                                                            | 1.562                                                                                                  | 1.388                                                                                          |
| $\mu$ [mm <sup>-1</sup> ]                                                | 3.017                                                                                                         | 5.635                                                            | 3.416                                                                                                  | 2.148                                                                                          |
| collected reflections                                                    | 80187                                                                                                         | 50041                                                            | 93046                                                                                                  | 69261                                                                                          |
| independent reflections                                                  | 11534                                                                                                         | 8378                                                             | 17700                                                                                                  | 11852                                                                                          |
| <i>R</i> <sub>int</sub> / <i>R</i> <sub>s</sub>                          | 0.0515/0.247                                                                                                  | 0.0912/0.0626                                                    | 0.0891/0.0574                                                                                          | 0.0192/0.114                                                                                   |
| parameters / restraints                                                  | 597/12                                                                                                        | 289/0                                                            | 913/0                                                                                                  | 611/12                                                                                         |
| <i>R</i> <sub>1</sub> [ <i>I</i> > 2 $\sigma$ ( <i>I</i> ) / all data]   | 0.0304/0.0396                                                                                                 | 0.0322/0.0494                                                    | 0.0509/0.0793                                                                                          | 0.0267/0.0340                                                                                  |
| w <i>R</i> <sub>2</sub> [ <i>I</i> > 2 $\sigma$ ( <i>I</i> ) / all data] | 0.0704/0.0761                                                                                                 | 0.0667/0.0694                                                    | 0.1210/0.1374                                                                                          | 0.0613/0.0668                                                                                  |
| goodness of fit                                                          | 1.062                                                                                                         | 0.919                                                            | 1.022                                                                                                  | 1.104                                                                                          |
| max./min. diff. el. density [e·Å <sup>-3</sup> ]                         | 2.262/-1.382                                                                                                  | 1.311/-0.935                                                     | 1.012/-0.880                                                                                           | 0.768/-0.572                                                                                   |
| depository no.                                                           | CCDC 1982121                                                                                                  | CSD 1982122                                                      | CCDC 1982123                                                                                           | CCDC 1982124                                                                                   |

  

| Compound                                                                 | 5                                                                                              | 6                                                                                      | 7                                                   | 8                                                               |
|--------------------------------------------------------------------------|------------------------------------------------------------------------------------------------|----------------------------------------------------------------------------------------|-----------------------------------------------------|-----------------------------------------------------------------|
| formula unit                                                             | C <sub>48</sub> H <sub>96</sub> N <sub>10</sub> O <sub>12</sub> K <sub>2</sub> Zn <sub>2</sub> | C <sub>30</sub> H <sub>39</sub> O <sub>6</sub> K <sub>0.84</sub> Rb <sub>0.16</sub> Zn | C <sub>47</sub> H <sub>76</sub> NO <sub>8</sub> KZn | C <sub>22</sub> H <sub>45</sub> N <sub>2</sub> O <sub>6</sub> K |
| fw [g·mol <sup>-1</sup> ]                                                | 1214.28                                                                                        | 607.38                                                                                 | 887.55                                              | 472.70                                                          |
| space group                                                              | <i>P</i> $\bar{1}$                                                                             | <i>Pca</i> 2 <sub>1</sub>                                                              | <i>P</i> 2 <sub>1</sub> / <i>c</i>                  | <i>Pbca</i>                                                     |
| <i>a</i> [Å]                                                             | 11.963(5)                                                                                      | 21.842(2)                                                                              | 15.7570(5)                                          | 10.1910(2)                                                      |
| <i>b</i> [Å]                                                             | 12.328(5)                                                                                      | 7.2588(15)                                                                             | 13.1722(5)                                          | 16.1458(3)                                                      |
| <i>c</i> [Å]                                                             | 12.683(6)                                                                                      | 18.322(3)                                                                              | 23.6712(8)                                          | 32.8773(9)                                                      |
| $\alpha$ [°]                                                             | 107.43(4)                                                                                      | 90                                                                                     | 90                                                  | 90                                                              |
| $\beta$ [°]                                                              | 106.66(4)                                                                                      | 90                                                                                     | 94.486(3)                                           | 90                                                              |
| $\gamma$ [°]                                                             | 104.16(3)                                                                                      | 90                                                                                     | 90                                                  | 90                                                              |
| <i>V</i> [Å <sup>3</sup> ]                                               | 1594.0(1)                                                                                      | 2904.9(8)                                                                              | 4898.0(3)                                           | 5409.7(2)                                                       |
| <i>Z</i>                                                                 | 1                                                                                              | 4                                                                                      | 4                                                   | 8                                                               |
| <i>T</i> [K]                                                             | 120(2)                                                                                         | 120(2)                                                                                 | 120(2)                                              | 150(2)                                                          |
| $\lambda$ [Å]                                                            | 0.71073                                                                                        | 0.71073                                                                                | 0.71073                                             | 0.71073                                                         |
| $\rho_{\text{calcd}}$ [g·cm <sup>-3</sup> ]                              | 1.265                                                                                          | 1.389                                                                                  | 1.204                                               | 1.161                                                           |
| $\mu$ [mm <sup>-1</sup> ]                                                | 0.942                                                                                          | 1.269                                                                                  | 0.635                                               | 0.231                                                           |
| collected reflections                                                    | 16857                                                                                          | 30260                                                                                  | 55312                                               | 148069                                                          |
| independent reflections                                                  | 6272                                                                                           | 5705                                                                                   | 9472                                                | 5311                                                            |
| <i>R</i> <sub>int</sub> / <i>R</i> <sub>s</sub>                          | 0.0828/0.1765                                                                                  | 0.1990/0.3101                                                                          | 0.0706/0.1068                                       | 0.0382/0.0115                                                   |
| parameters / restraints                                                  | 344/0                                                                                          | 343/72                                                                                 | 552/0                                               | 295/0                                                           |
| <i>R</i> <sub>1</sub> [ <i>I</i> > 2 $\sigma$ ( <i>I</i> ) / all data]   | 0.0510/0.1097                                                                                  | 0.0540/ 0.1647                                                                         | 0.0455/0.0950                                       | 0.0353/0.0422                                                   |
| w <i>R</i> <sub>2</sub> [ <i>I</i> > 2 $\sigma$ ( <i>I</i> ) / all data] | 0.1003/0.1106                                                                                  | 0.0902/ 0.1059                                                                         | 0.1018/0.1107                                       | 0.0939/0.0987                                                   |
| goodness of fit                                                          | 0.768                                                                                          | 0.655                                                                                  | 0.840                                               | 1.021                                                           |
| max./min. diff. el. density [e·Å <sup>-3</sup> ]                         | 0.913/-0.608                                                                                   | 0.826/-0.486                                                                           | 0.659/-0.489                                        | 0.354/-0.313                                                    |
| CCDC                                                                     | CCDC 1982125                                                                                   | CCDC 1982126                                                                           | CCDC 1982127                                        | CCDC 1982128                                                    |

## Crystal structures of 1 – 8 and selected bond lengths of 1a – 8a

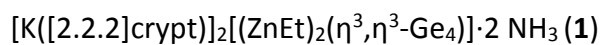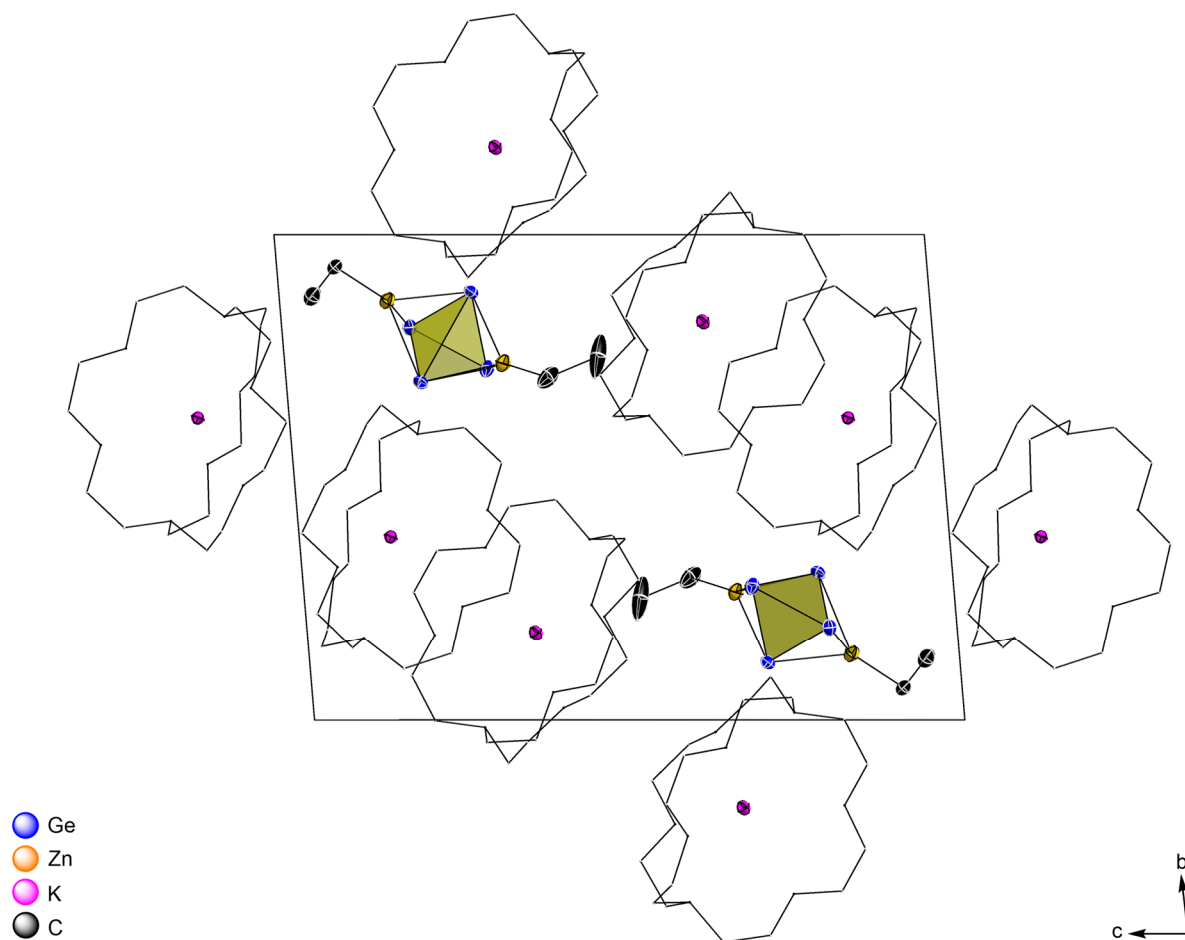

Figure S1: Crystal structure of compound **1**, view along  $[\bar{1}00]$ . All ellipsoids are shown at a 50 % probability level as octants. Color code: Ge: blue; Zn: orange; K: purple; C: black. The clusters are shown as polyhedra. Ammonia molecules as well as protons are omitted. Cryptand molecules are presented as wire/stick for clarity.

Table S2: Selected bond lengths in **1**.

| Atoms     | Bond lengths [Å] | Atoms     | Bond lengths [Å] |
|-----------|------------------|-----------|------------------|
| Ge1 – Ge2 | 2.9279(4)        | Ge3 – Ge4 | 2.4714(4)        |
| Ge1 – Ge3 | 2.5859(4)        | Ge1 – Ge4 | 2.5970(4)        |
| Ge2 – Ge3 | 2.5976(4)        | Ge2 – Ge4 | 2.6046(4)        |
| Ge1 – Zn1 | 2.5159(4)        | Ge1 – Zn2 | 2.5267(4)        |
| Ge2 – Zn1 | 2.5177(4)        | Ge2 – Zn2 | 2.5134(4)        |
| Ge3 – Zn1 | 2.7096(5)        | Ge4 – Zn2 | 2.6822(5)        |
| Zn1 – C37 | 2.009(3)         | Zn2 – C39 | 2.004(3)         |
| C37 – C38 | 1.534(4)         | C39 – C40 | 1.523(6)         |

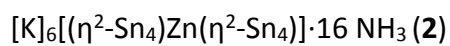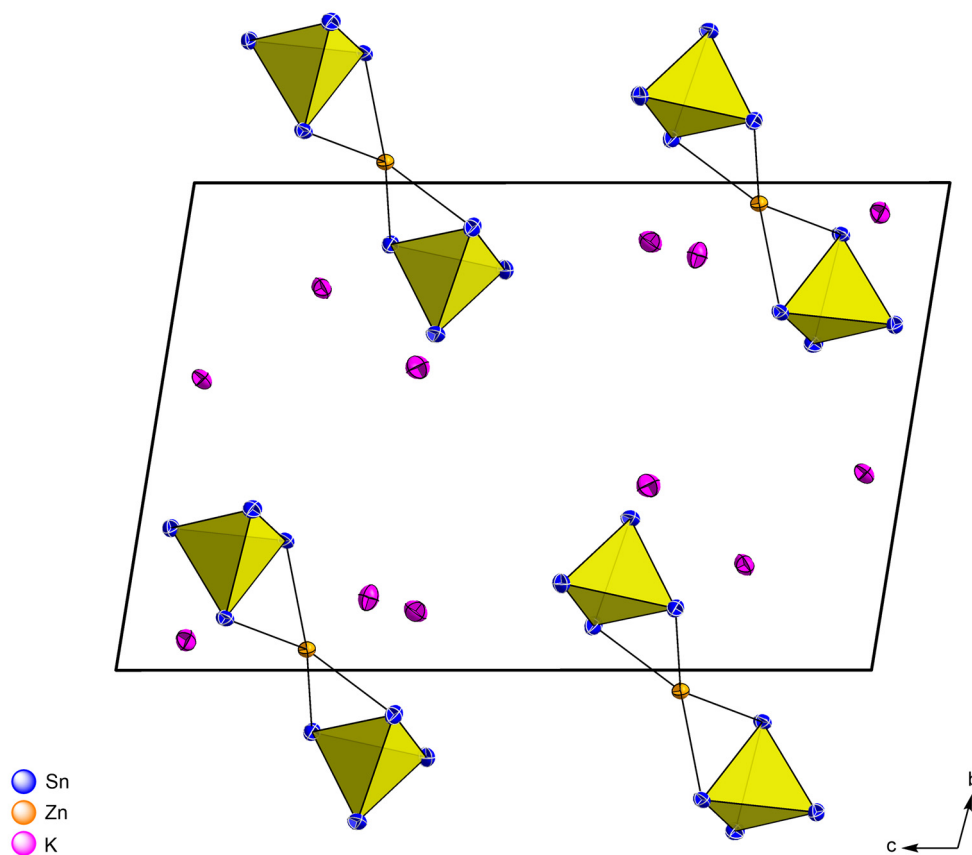

Figure S2: Crystal structure of compound **2**, view along  $\bar{1}00$ . All ellipsoids are shown at a 50 % probability level. Color code: Sn: blue; Zn: orange; K: purple. The clusters are shown as polyhedra. Ammonia molecules are omitted for clarity.

Table S3: Selected bond lengths in **2**.

| Atoms     | Bond lengths [Å] | Atoms     | Bond lengths [Å] |
|-----------|------------------|-----------|------------------|
| Zn1 – Sn1 | 2.7450(8)        | Zn1 – Sn5 | 2.7512(8)        |
| Zn1 – Sn2 | 2.7611(8)        | Zn1 – Sn6 | 2.7258(8)        |
| Sn1 – Sn2 | 3.0785(6)        | Sn5 – Sn6 | 3.0723(6)        |
| Sn1 – Sn3 | 2.9038(6)        | Sn5 – Sn7 | 2.8964(6)        |
| Sn1 – Sn4 | 2.9071(6)        | Sn5 – Sn8 | 2.9033(6)        |
| Sn2 – Sn3 | 2.9100(6)        | Sn6 – Sn7 | 2.8998(6)        |
| Sn2 – Sn4 | 2.8904(6)        | Sn6 – Sn8 | 2.8827(6)        |
| Sn3 – Sn4 | 2.9492(6)        | Sn7 – Sn8 | 2.9402(6)        |

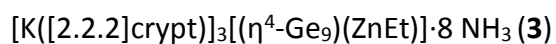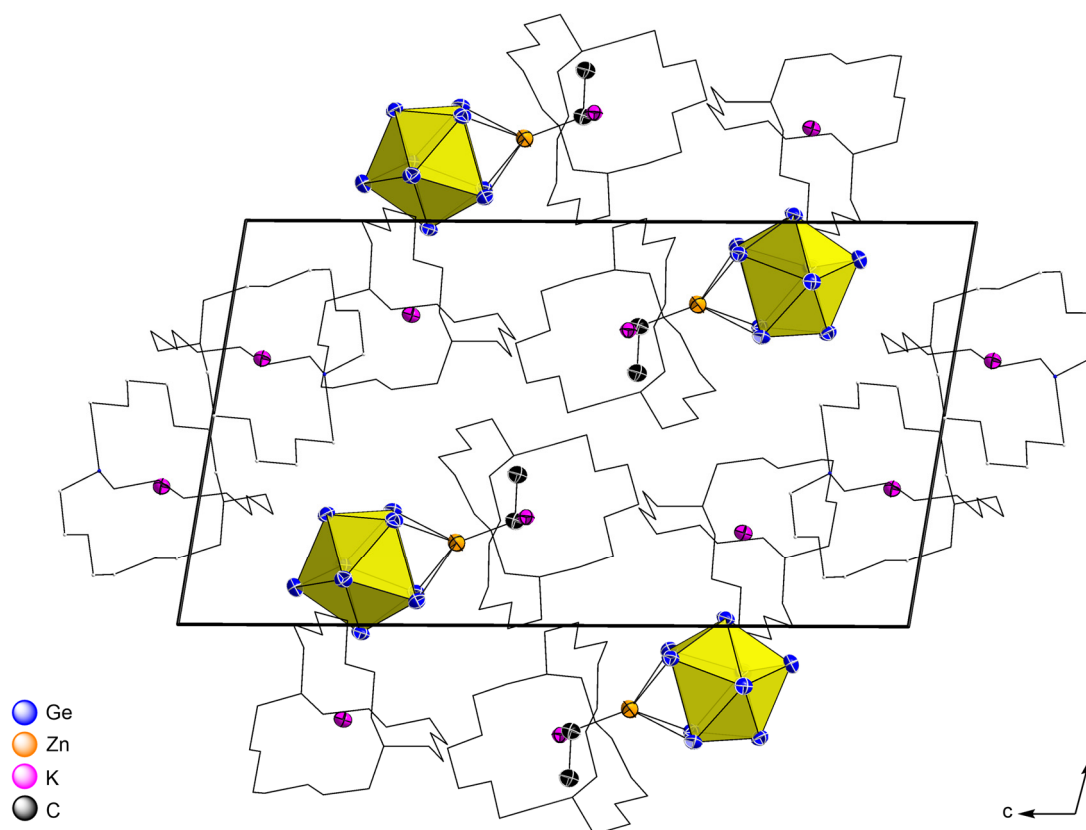

Figure S3: Crystal structure of compound **3**, view along  $\bar{1}00$ . All ellipsoids are shown at a 50 % probability level. Color code: Ge: blue; Zn: orange; K: purple; C: black. The clusters are shown as polyhedra. Ammonia molecules as well as protons are omitted, cryptand molecules are presented as wire/stick for clarity.

Table S4: Selected bond lengths in **3**.

| Atoms   | Bond lengths [Å] | Atoms   | Bond lengths [Å] |
|---------|------------------|---------|------------------|
| Ge1–Zn  | 2.6437(9)        | Ge5–Ge9 | 2.5813(8)        |
| Ge2–Zn  | 2.6001(8)        | Ge6–Ge9 | 2.6001(8)        |
| Ge3–Zn  | 2.5921(9)        | Ge7–Ge9 | 2.5645(8)        |
| Ge4–Zn  | 2.6105(8)        | Ge8–Ge9 | 2.5733(8)        |
| Ge1–Ge2 | 2.7643(8)        | Ge5–Ge6 | 2.8036(8)        |
| Ge2–Ge3 | 2.7962(8)        | Ge6–Ge7 | 2.8131(8)        |
| Ge3–Ge4 | 2.7868(8)        | Ge7–Ge8 | 2.8612(8)        |
| Ge4–Ge1 | 2.7493(8)        | Ge8–Ge5 | 2.8465(8)        |
| Ge1–Ge5 | 2.5590(7)        | Ge3–Ge7 | 2.5591(7)        |
| Ge1–Ge6 | 2.5717(7)        | Ge3–Ge8 | 2.5494(7)        |
| Ge2–Ge6 | 2.5692(7)        | Ge4–Ge5 | 2.5742(7)        |
| Ge2–Ge7 | 2.5478(7)        | Ge4–Ge8 | 2.5590(8)        |
| Zn–C1   | 2.015(5)         | C1–C2   | 1.515(7)         |

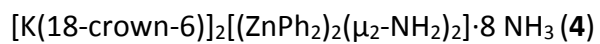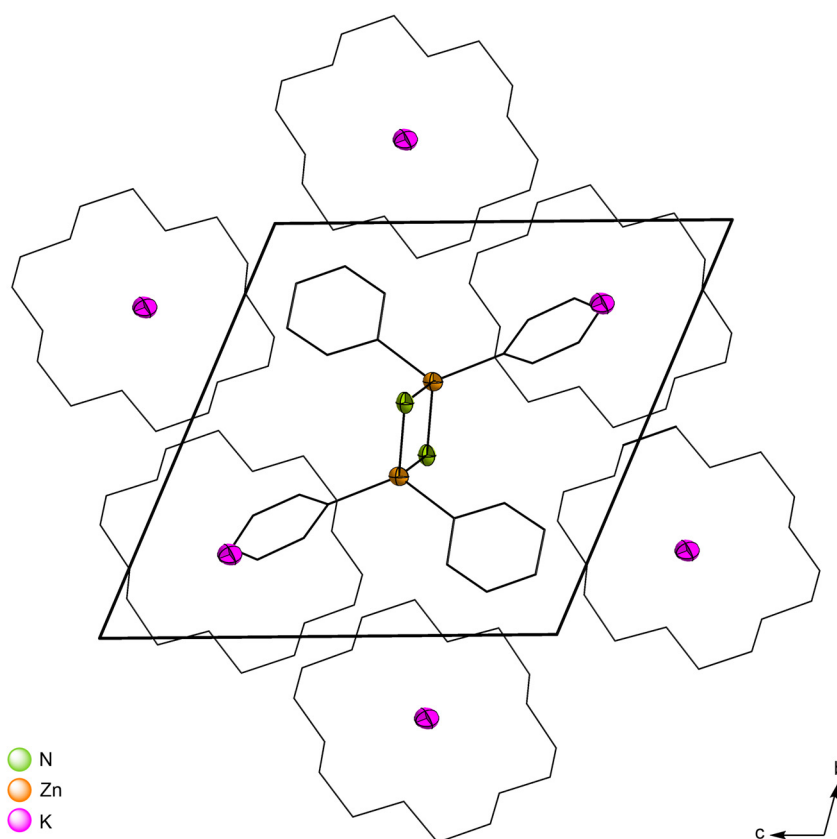

Figure S4: Crystal structure of compound **4**, view along  $[\bar{1}00]$ . All ellipsoids are shown at a 50 % probability level. Color code: N: green; Zn: orange; K: purple. Ammonia molecules as well as protons are omitted, crown ether molecules as well as phenyl groups are presented as wire/stick for clarity.

Table S5: Selected bond lengths in **4** (Symmetry operation: i:  $(-x), (1-y), (1-z)$ ).

| Atoms             | Bond lengths [ $\text{\AA}$ ] |
|-------------------|-------------------------------|
| Zn–N              | 2.104(4)                      |
| Zn–N <sup>i</sup> | 2.045(4)                      |
| Zn–C13            | 2.046(4)                      |
| Zn–C19            | 2.034(4)                      |

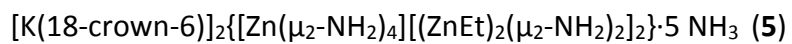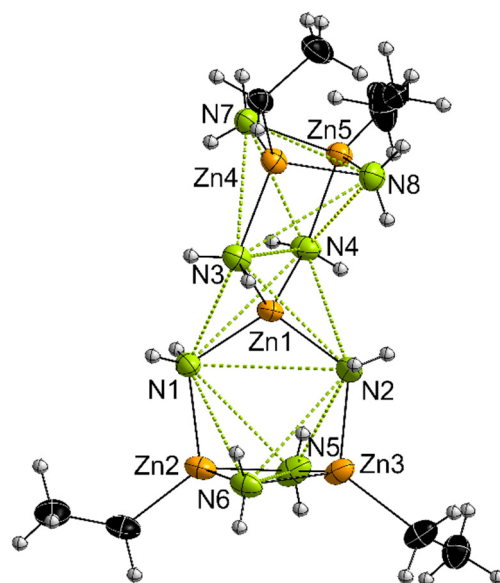

Figure S5: Molecular structure of the pentanuclear Zn complex **5a**. All ellipsoids are shown at a 50 % probability level. Color code: Zn: orange; N: light blue; C: black; H: grey.

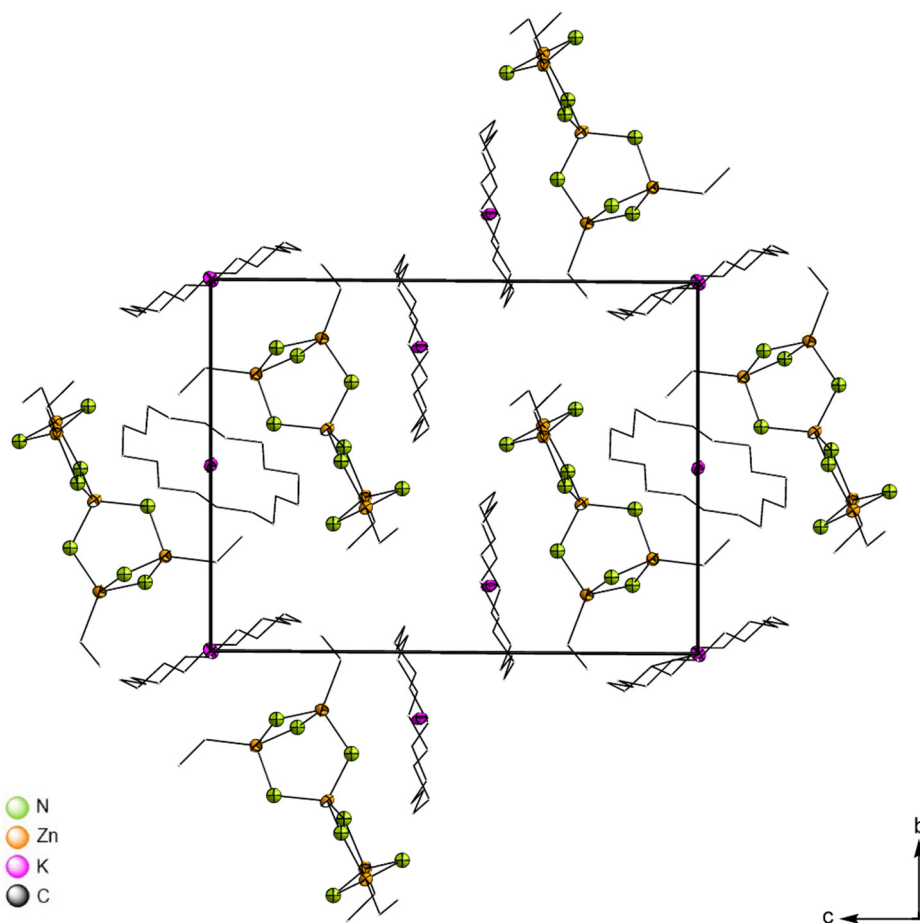

Figure S6: Crystal structure of compound **5**, view along  $[100]$ . All ellipsoids are shown at a 50 % probability level. Color code: N: green; Zn: orange; K: purple. Ammonia molecules as well as protons are omitted, crown ether molecules as well as ethyl groups are presented as wire/stick for clarity.

Table S6: Selected bond lengths in **5**.

| Atoms     | Bond lengths [Å] | Atoms     | Bond lengths [Å] |
|-----------|------------------|-----------|------------------|
| Zn1 – N1  | 2.0550(2)        | Zn1 – N3  | 2.042(2)         |
| Zn1 – N2  | 2.038(2)         | Zn1 – N4  | 2.052(2)         |
| Zn2 – N1  | 2.0649(2)        | Zn4 – N3  | 2.081(2)         |
| Zn2 – N5  | 2.060(2)         | Zn4 – N7  | 2.080(2)         |
| Zn2 – N6  | 2.089(2)         | Zn4 – N8  | 2.075(2)         |
| Zn3 – N2  | 2.077(2)         | Zn5 – N4  | 2.063(2)         |
| Zn3 – N5  | 2.075(2)         | Zn5 – N7  | 2.0778(2)        |
| Zn3 – N6  | 2.080(2)         | Zn5 – N8  | 2.084(2)         |
| Zn2 – C25 | 2.052(3)         | C25 – C26 | 1.534(4)         |
| Zn3 – C27 | 2.047(2)         | C27 – C28 | 1.580(3)         |
| Zn4 – C29 | 2.031(2)         | C29 – C30 | 1.515(4)         |
| Zn5 – C31 | 2.039(2)         | C31 – C32 | 1.534(3)         |



[K<sub>0.8</sub>Rb<sub>0.2</sub>(18-crown-6)][ZnPh<sub>3</sub>] (**6**)

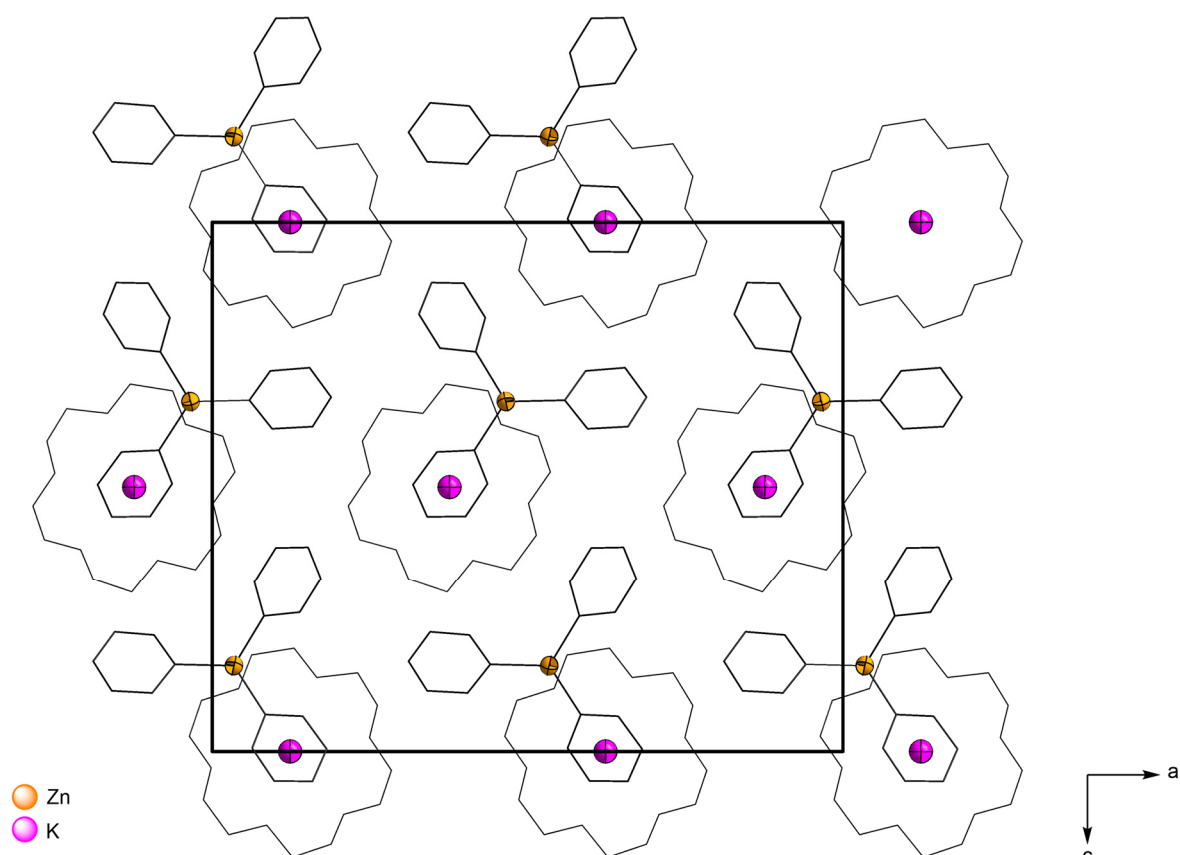

Figure S7: Crystal structure of compound **6**, view along  $[0\bar{1}0]$ . All ellipsoids are shown at a 50 % probability level. Color code: Zn: orange; K/Rb: purple; C: black. Protons are omitted, crown ether molecules as well as phenyl groups are presented as wire/stick for clarity.

Table S7: Selected bond lengths in **6**.

| Atoms   | Bond lengths [Å]        |
|---------|-------------------------|
| Zn–C13  | 2.013(1)                |
| Zn–C19  | 2.018(2)                |
| Zn–C25  | 2.030(8)                |
| C16–C17 | 1.343(2) (shortest C–C) |
| C13–C14 | 1.420(2) (longest C–C)  |

[K(18-crown-6)][ZnMes<sub>3</sub>] $\cdot$ NH<sub>3</sub> $\cdot$ 2 thf (**7**)

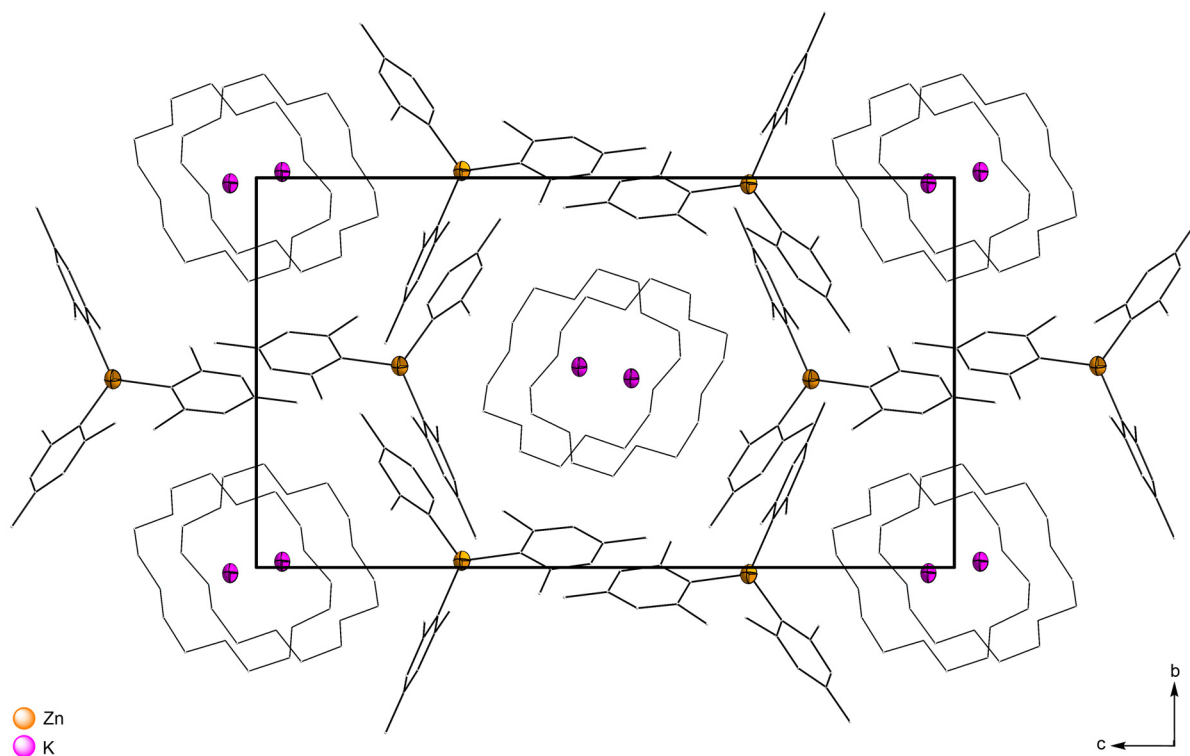

Figure S8: Crystal structure of compound **7**, view along  $[100]$ . All ellipsoids are shown at a 50 % probability level. Color code: Zn: orange; K: purple; C: black. Protons, NH<sub>3</sub> as well as thf molecules are omitted, crown ether molecules as well as mesityl groups are presented as wire/stick for clarity.

Table S8: Selected bond lengths in **7**.

| Atoms   | Bond lengths [Å]        |
|---------|-------------------------|
| Zn–C13  | 2.041(3)                |
| Zn–C22  | 2.042(3)                |
| Zn–C31  | 2.047(3)                |
| C33–C34 | 1.382(4) (shortest C–C) |
| C25–C29 | 1.521(4) (longest C–C)  |

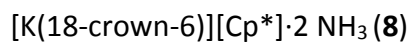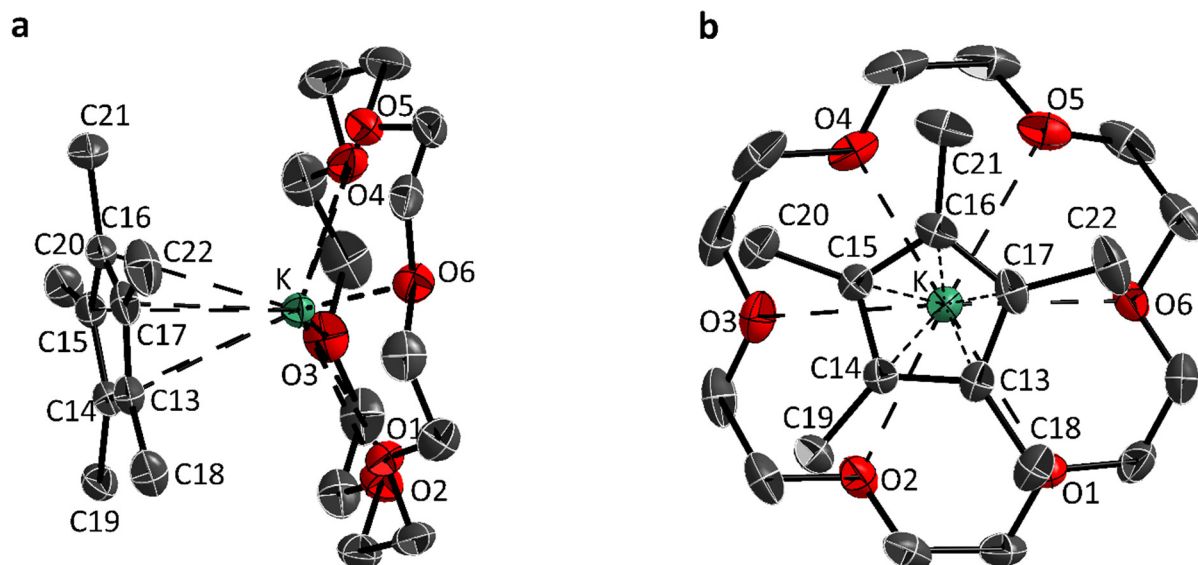

Figure S9: Molecular structure of **8a** in a) side view and b) top view. All ellipsoids are shown at a 50 % probability level. C: black; K: purple; O: red. Ammonia molecules as well as protons are omitted.

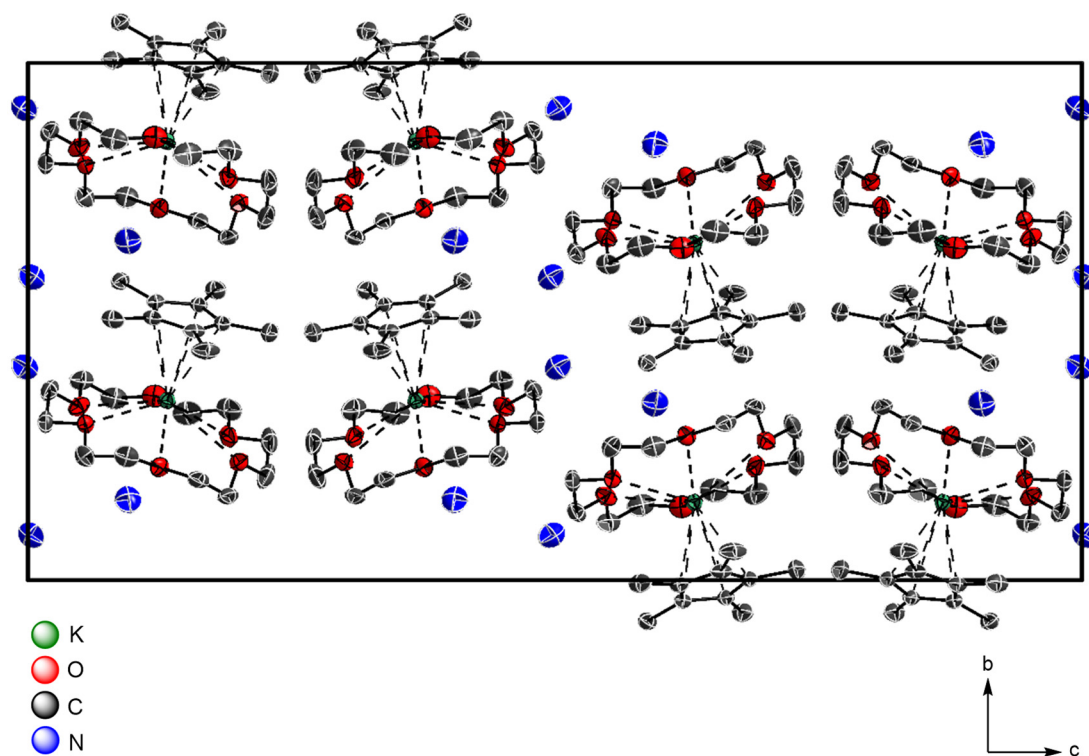

Figure S10: Crystal structure of compound **8**, view along [100]. All ellipsoids are shown at a 50 % probability level. Color code: K: green; C: black; O: red; N blue. Protons are omitted for clarity.

Table S9: Selected bond lengths in **8**.

| Atoms | Bond lengths [Å] | Atoms   | Bond lengths [Å] |
|-------|------------------|---------|------------------|
| K-O1  | 2.9647(10)       | C13-C14 | 1.415(2)         |
| K-O2  | 3.1146(11)       | C14-C15 | 1.415(2)         |
| K-O3  | 2.9132(12)       | C15-C16 | 1.407(2)         |
| K-O4  | 2.8872(11)       | C16-C17 | 1.413(2)         |
| K-O5  | 3.0673(11)       | C17-C13 | 1.412(2)         |
| K-O6  | 2.9768(11)       | C13-C18 | 1.505(2)         |
| K-C13 | 3.0278(13)       | C14-C19 | 1.506(2)         |
| K-C14 | 3.1194(13)       | C15-C20 | 1.507(2)         |
| K-C15 | 3.1531(13)       | C16-C21 | 1.506(2)         |
| K-C16 | 3.0744(14)       | C17-C22 | 1.504(2)         |
| K-C17 | 2.9941(14)       |         |                  |

## ESI-MS spectra

ESI-MS analyses were performed on a Bruker Daltonic HCT mass spectrometer (dry gas temperature: 300 °C; injection speed: 240  $\mu\text{L}/\text{h}$ ), and the data evaluation was carried out using the Bruker Compass Data Analysis 4.0 SP 5 program (Bruker). Data evaluation was performed using OriginPro2016G (Origin Lab) and Excel 2016 (Microsoft). The sample preparation was as follows:

Reaction for anion **1a**: Onto a mixture of  $\text{K}_4\text{Ge}_4$  (35 mg, 80  $\mu\text{mol}$ , 1 eq.),  $\text{ZnEt}_2$  (160  $\mu\text{L}$ , 160  $\mu\text{mol}$ , 2 eq.) and [2.2.2]crypt (53.1 mg, 140  $\mu\text{mol}$ , 1.8 eq.) 2 mL of liquid ammonia are condensed.

Reaction for anion **3a**: Onto a mixture of  $\text{K}_4\text{Ge}_9$  (40 mg, 50  $\mu\text{mol}$ , 1 eq.),  $\text{ZnEt}_2$  (100  $\mu\text{L}$ , 100  $\mu\text{mol}$ , 2 eq.) and [2.2.2]crypt (33.5 mg, 90  $\mu\text{mol}$ , 1.8 eq.) 2 mL of liquid ammonia are condensed.

After the addition of ammonia, the obtained dark red solutions were stirred at -78 °C for 4 h using a glass stirring bar and subsequently stored in a freezer at -40 °C for 2 weeks. Afterwards, the solvent was evaporated, the residue extracted with acetonitrile (1 mL), and the obtained solution was injected into the measuring device after filtration. Due to slow molecular dynamics at -40 °C product formation is a long lasting process and signal-to-noise ratios of such ESI-MS measurements are usually low. However, signals at  $m/z$  802.0  $\{[\text{K}([\text{2.2.2}]\text{crypt})][\text{Ge}_4(\text{ZnEt})]^-$  (ionization product of **1a**, negative-ion mode, 2500 V, 300 °C) and  $m/z$  746.2 for  $[\text{Ge}_9(\text{ZnEt})]^-$  (**3a**, negative-ion mode, 2500 V, 300 °C) could be detected and are in good accordance to the theoretical isotope distribution (black bars in Figures 1 and S11). Sn-containing samples could not be measured due to their high instability which led to an immediate metal mirror formation in the injection needle.

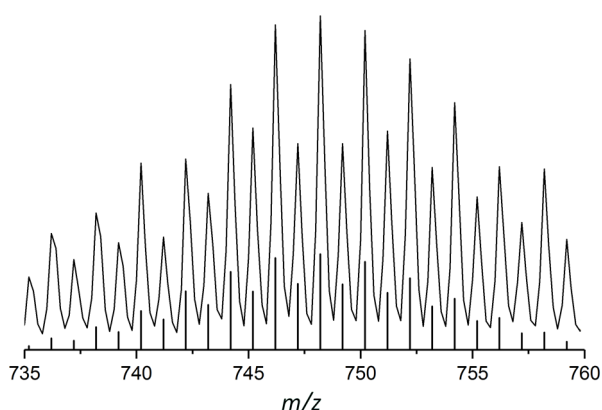

Figure S11: ESI-MS spectrum of  $[\text{Ge}_9(\text{ZnEt})]^-$  (**3a**) in MeCN (negative-ion mode, 2500 V, 300 °C) monitoring the molecule peak at  $m/z$  746.2. The calculated pattern is presented as red bars. Due to the low concentration of **3a** in the injected solution, the signal to noise ratio was low.
